# Supplementary material for: Site-sensitive energy transfer modes in Ca3Al2O6: Ce3+/Tb3+/Mn2+phosphors
Source: Royal Society of Chemistry journal article supplement (doi:10.1039/c4dt01587h), 2014-08-18
Supplement: c4dt01587h1.pdf [file c4dt01587h1.pdf]

### **Supporting Information**

## Site-Sensitive Energy Transfer Modes in $\text{Ca}_3\text{Al}_2\text{O}_6$ : $\text{Ce}^{3+}/\text{Tb}^{3+}/\text{Mn}^{2+}$ Phosphors

Jilin Zhang<sup>a, b, \*</sup>, Yani He<sup>a, b</sup>, Zhongxian Qiu<sup>a, b</sup>, Weilu Zhang<sup>a, b</sup>, Wenli Zhou<sup>a, b</sup>,  
Liping Yu<sup>a, b</sup>, Shixun Lian<sup>a, b, \*</sup>

<sup>a</sup> Key Laboratory of Chemical Biology and Traditional Chinese Medicine Research  
(Ministry of Education of China), Hunan Normal University, Changsha 410081,  
China.

<sup>b</sup> Key Laboratory of Sustainable Resources Processing and Advanced Materials of  
Hunan Province College, Hunan Normal University, Changsha 410081, China.

\*Corresponding Authors: Fax and Tel: +86 731 88865345; E-mail:

[chemzhangjl@163.com](mailto:chemzhangjl@163.com) (Jilin Zhang), [shixunlian@gmail.com](mailto:shixunlian@gmail.com) (Shixun Lian).

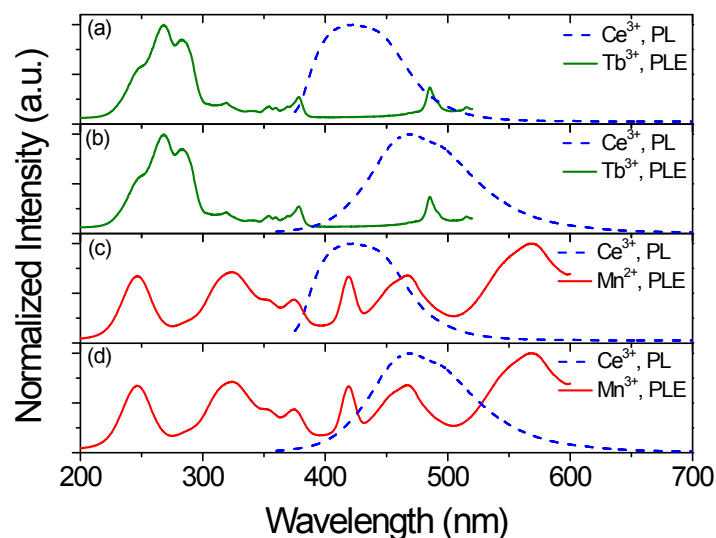

**Figure S1.** The comparison of PLE spectra of  $\text{Tb}^{3+}/\text{Mn}^{2+}$  and PL spectra of  $\text{Ce}^{3+}$  in  $\text{Ca}_3\text{Al}_2\text{O}_6$ , showing different spectral overlap manners.

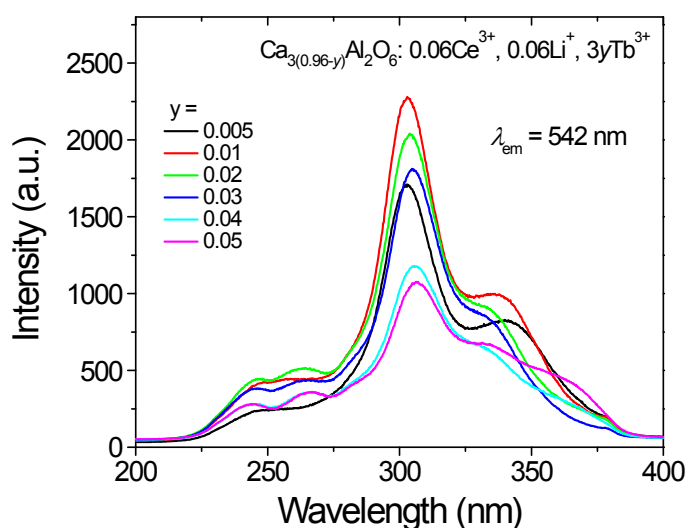

**Figure S2.** PLE spectra of  $\text{Ca}_{3(0.96-y)}\text{Al}_2\text{O}_6: 0.06\text{Ce}^{3+}, 0.06\text{Li}^+, 3y\text{Tb}^{3+}$  monitored at 542 nm. Excitation bands contain several bands. The highest one is at  $\sim 305$  nm with a shoulder at  $\sim 335$  nm, which belongs to  $f-d$  transition of  $\text{Ce}^{3+}$ , suggesting energy transfer from  $\text{Ce}^{3+}$  to  $\text{Tb}^{3+}$ . An additional band at  $\sim 367$  nm appears when  $y$  is higher than 0.04. This phenomenon indicates the existence of purplish-blue  $\text{Ce}^{3+}$  and the transfer of its energy to  $\text{Tb}^{3+}$  with a high content. Furthermore, the excitation bands at about 245, 263 and 283 nm are consistent with that of  $\text{Tb}^{3+}$  single-doped one.

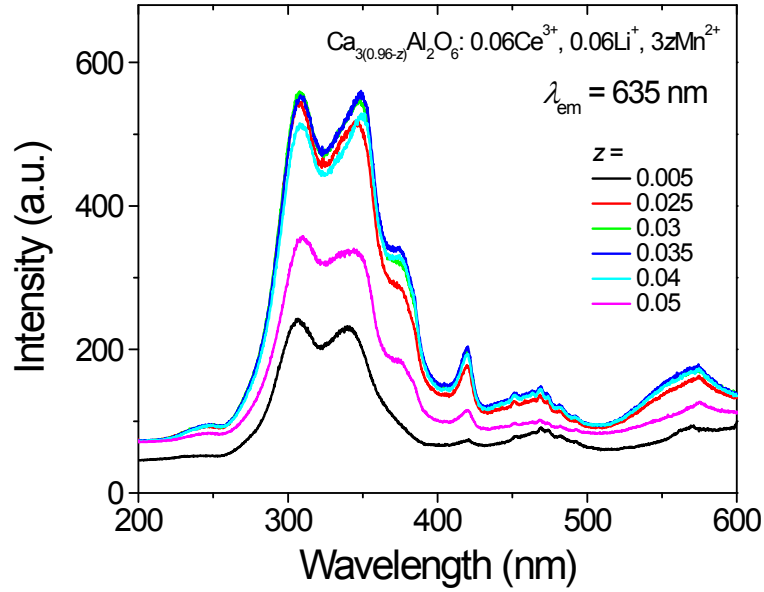

**Figure S3.** PLE spectra of  $\text{Ca}_{3(0.96-z)}\text{Al}_2\text{O}_6: 0.06\text{Ce}^{3+}, 0.06\text{Li}^+, 3z\text{Mn}^{2+}$  monitored at 635 nm. The excitation bands mainly two bands at 305 and  $\sim 335$  nm, which are similar as that monitored at 470 nm. These results suggest energy transfer from greenish-blue  $\text{Ce}^{3+}$  to  $\text{Mn}^{2+}$ . In addition, a shoulder band at  $\sim 370$  nm and several bands in 400-600 range appear, which originate from  $d-d$  transitions of  $\text{Mn}^{2+}$  itself.
